# Supplementary material for: Cartilage Regeneration Using Human Umbilical Cord Blood Derived Mesenchymal Stem Cells: A Systematic Review and Meta-Analysis
Source: MDPI journal article supplement (doi:10.3390/medicina58121801), 2022-12-06
Supplement: s1 [file s1]

Supplementary file S3. M-MOCART score & 2<sup>nd</sup> look arthroscopic findings of included studies.

| study        | follow up               | Treatment | number of patients:<br>MRI | M-MOCART      |                     | number of patients:<br>2nd look<br>arthroscopy |     | ICRS grade at 2nd look<br>arthroscopy |    |    |    |
|--------------|-------------------------|-----------|----------------------------|---------------|---------------------|------------------------------------------------|-----|---------------------------------------|----|----|----|
|              |                         |           |                            |               |                     | subgroup                                       |     | 1                                     | 2  | 3  | 4  |
| chung 2021   | mean 1.7Y<br>(1.0-3.5Y) | hUCB-MSC  |                            | N/A           |                     | 49                                             | N/A | 4                                     | 34 | 11 | 0  |
| song(1) 2020 | 36.1 ± 6.4M<br>(25-47M) |           |                            | 3-6M(mean3.8) | After 12M(mean21.2) | N/A                                            |     |                                       |    |    |    |
|              |                         | hUCB-MSC  | 34                         | 30.58         | 55.44               |                                                |     |                                       |    |    |    |
| song(2) 2020 | 3Y                      | hUCB-MSC  |                            | N/A           |                     | 125                                            | N/A | 73                                    | 37 | 15 | 0  |
| song(3) 2020 | 26.7±1.8M<br>(24–31M)   | hUCB-MSC  |                            | N/A           |                     | 14                                             | N/A | 6                                     | 8  | 0  | 0  |
| Lee 2021     | 20.7 ± 6.1M             | BMAC      |                            | N/A           |                     | 42                                             | MFC | 1                                     | 18 | 12 | 11 |
|              |                         |           |                            |               |                     |                                                | MTC | 1                                     | 16 | 9  | 16 |
|              | 15.6 ± 2.8M             | hUCB-MSC  |                            | N/A           |                     | 32                                             | MFC | 6                                     | 20 | 6  | 0  |
|              |                         |           |                            |               |                     |                                                | MTC | 2                                     | 24 | 5  | 1  |
| Ryu 2022     | 2Y                      |           |                            | 1Y            | 2Y                  |                                                |     | ICRS repair grade score               |    |    |    |
|              |                         |           |                            |               |                     |                                                |     | 1Y                                    |    |    |    |
|              |                         | BMAC      | 25                         | 65.4 ± 13.46  | 70.20 ± 13.58       | 12                                             | N/A | 9.42 ± 1.83                           |    |    |    |
|              |                         | hUCB-MSC  | 27                         | 69.63 ± 13.37 | 73.7 ± 13.2         | 16                                             | N/A | 9.75 ± 2.05                           |    |    |    |

M-MOCART = Modified Magnetic Resonance Observation of Cartilage Repair Tissue, ICRS = International Cartilage Repair Society, Y = year, M = month, hUCB-MSC = human umbilical cord blood-derived mesenchymal stem cell, BMAC = bone marrow aspiration concentrate, MFC = medial femoral condyle, MTC = medial tibial condyle
