# Supplementary material for: Cartilage Regeneration Using Human Umbilical Cord Blood Derived Mesenchymal Stem Cells: A Systematic Review and Meta-Analysis
Source: MDPI journal article supplement (doi:10.3390/medicina58121801), 2022-12-06
Supplement: s1 [file s1]

## Supplementary file S1. Keywords and search result

| Database | Search | Keywords                                                                                                                                                                                                                                                                                                                                                                                                                                                                                                                                                                                                                                                                                            | Results        |
|----------|--------|-----------------------------------------------------------------------------------------------------------------------------------------------------------------------------------------------------------------------------------------------------------------------------------------------------------------------------------------------------------------------------------------------------------------------------------------------------------------------------------------------------------------------------------------------------------------------------------------------------------------------------------------------------------------------------------------------------|----------------|
| PubMed   | #1     | "Cartilage, Articular"[Mesh]                                                                                                                                                                                                                                                                                                                                                                                                                                                                                                                                                                                                                                                                        | 32,176         |
|          | #2     | "Cartilage, Articular"[TW] OR "Articular Cartilage"[TW] OR "Articular Cartilages"[TW] OR "Cartilages, Articular"[TW] OR "knee cartilage defect"[TW] OR "cartilage, joint"[TW] OR "joint cartilage"[TW]                                                                                                                                                                                                                                                                                                                                                                                                                                                                                              | 41,665         |
|          | #3     | "Knee Joint"[Mesh]                                                                                                                                                                                                                                                                                                                                                                                                                                                                                                                                                                                                                                                                                  | 68,467         |
|          | #4     | "Knee Joint"[TW] OR "Joint, Knee"[TW] OR "Joints, Knee"[TW] OR "Knee Joints"[TW] OR "Superior Tibiofibular Joint"[TW] OR "Joint, Superior Tibiofibular"[TW] OR "Joints, Superior Tibiofibular"[TW] OR "Superior Tibiofibular Joints"[TW] OR "Tibiofibular Joint, Superior"[TW] OR "Tibiofibular Joints, Superior"[TW]                                                                                                                                                                                                                                                                                                                                                                               | 76,539         |
|          | #5     | "Osteoarthritis, Knee"[Mesh]                                                                                                                                                                                                                                                                                                                                                                                                                                                                                                                                                                                                                                                                        | 24,984         |
|          | #6     | "Osteoarthritis, Knee"[TW] OR "Knee Osteoarthritis"[TW] OR "Knee Osteoarthritis of Knee"[TW] OR "Osteoarthritis of the Knee"[TW] OR "osteoarthritic knee"[TW] OR "osteoarthritic knees"[TW] OR "arthrosis, knee"[TW] OR "femorotibial arthrosis"[TW] OR "gonarthrosis"[TW] OR "knee arthrosis"[TW] OR "knee joint arthrosis"[TW] OR "knee joint osteoarthritis"[TW] OR "knee osteo-arthritis"[TW] OR "knee osteo-arthrosis"[TW] OR "knee osteoarthrosis"[TW] OR "osteoarthrosis, knee"[TW]                                                                                                                                                                                                          | 31,576         |
|          | #7     | <b>#1 OR #2 OR #3 OR #4 OR #5 OR #6</b>                                                                                                                                                                                                                                                                                                                                                                                                                                                                                                                                                                                                                                                             | <b>130,707</b> |
|          | #8     | "human umbilical cord blood-derived mesenchymal stem cell"[TW] OR "human umbilical cord blood-derived mesenchymal stem cells"[TW] OR "hUCB-MSC"[TW] OR "hUCB-MSCs"[TW] OR "umbilical cord blood-derived mesenchymal stem cell"[TW] OR "umbilical cord blood-derived mesenchymal stem cells "[TW] OR "UCB-MSC"[TW] OR "UCB-MSCs"[TW] OR "umbilical cord blood stem cell"[TW] OR "umbilical cord blood stem cells"[TW] OR "UC-mesenchymal stem cells"[TW] OR "UC-MSC"[TW] OR "umbilical cord mesenchymal stem cell"[TW] OR "umbilical cord (UC) -mesenchymal stem cells (MSC)"[TW] OR "umbilical cord mesenchymal stem cells"[TW] OR "umbilical cord MSC"[TW] OR "umbilical cord MSC (UC-MSC)"[TW] OR | 2,752          |

|          |        | "umbilical cord-derived mesenchymal stem cell"[TW] OR<br>"umbilical cord-derived mesenchymal stem cells"[TW]                                                                                                                                                                                                                                                                                            |              |
|----------|--------|---------------------------------------------------------------------------------------------------------------------------------------------------------------------------------------------------------------------------------------------------------------------------------------------------------------------------------------------------------------------------------------------------------|--------------|
|          | #9     | "UC-MSC transplantation"[TW] OR "umbilical cord-derived mesenchymal stem cell transplantation"[TW] OR "umbilical cord (UC) mesenchymal stem cells transplantation (MSCT)"[TW] OR "umbilical cord (UC) -derived mesenchymal stem cells (MSCs)"[TW] OR "UCMSCT"[TW] OR "UC-MSCT"[TW]                                                                                                                      | 53           |
|          | #10    | "Cord Blood Stem Cell Transplantation"[Mesh]                                                                                                                                                                                                                                                                                                                                                            | 3,602        |
|          | #11    | "Cord Blood Stem Cell Transplantation"[TW] OR "Stem Cell Transplantation, Placental Blood"[TW] OR "Umbilical Cord Blood Stem Cell Transplantation"[TW] OR "Placental Blood Stem Cell Transplantation"[TW] OR "Stem Cell Transplantation, Cord Blood"[TW] OR "Blood Stem Cell Transplantation, Umbilical Cord"[TW] OR "cord blood transplantation"[TW] OR "umbilical cord stem cell transplantation"[TW] | 4,592        |
|          | #12    | <b>#8 OR #9 OR #10 OR #11</b>                                                                                                                                                                                                                                                                                                                                                                           | <b>7,044</b> |
|          | #13    | <b>#7 AND #12</b>                                                                                                                                                                                                                                                                                                                                                                                       | <b>62</b>    |
|          |        |                                                                                                                                                                                                                                                                                                                                                                                                         |              |
| Database | Search | Keywords                                                                                                                                                                                                                                                                                                                                                                                                | Results      |
| EMBASE   | #1     | "articular cartilage"/exp                                                                                                                                                                                                                                                                                                                                                                               | 32,740       |
|          | #2     | "Cartilage, Articular":ti,ab,kw,de OR "Articular Cartilage":ti,ab,kw,de OR "Articular Cartilages":ti,ab,kw,de OR "Cartilages, Articular":ti,ab,kw,de OR "knee cartilage defect":ti,ab,kw,de OR "cartilage, joint":ti,ab,kw,de OR "joint cartilage":ti,ab,kw,de                                                                                                                                          | 43,553       |
|          | #3     | "knee"/exp                                                                                                                                                                                                                                                                                                                                                                                              | 77,583       |

|    |                                                                                                                                                                                                                                                                                                                                                                                                                                                                                                                                                                                                                                                                                                                                                                                                                                                                                                                    |                |
|----|--------------------------------------------------------------------------------------------------------------------------------------------------------------------------------------------------------------------------------------------------------------------------------------------------------------------------------------------------------------------------------------------------------------------------------------------------------------------------------------------------------------------------------------------------------------------------------------------------------------------------------------------------------------------------------------------------------------------------------------------------------------------------------------------------------------------------------------------------------------------------------------------------------------------|----------------|
| #4 | "Knee Joint":ti,ab,kw,de OR "Joint, Knee":ti,ab,kw,de OR<br>"Joints, Knee":ti,ab,kw,de OR "Knee Joints":ti,ab,kw,de OR<br>"Superior Tibiofibular Joint":ti,ab,kw,de OR "Joint, Superior<br>Tibiofibular":ti,ab,kw,de OR "Joints, Superior<br>Tibiofibular":ti,ab,kw,de OR "Superior Tibiofibular<br>Joints":ti,ab,kw,de OR "Tibiofibular Joint,<br>Superior":ti,ab,kw,de OR "Tibiofibular Joints,<br>Superior":ti,ab,kw,de                                                                                                                                                                                                                                                                                                                                                                                                                                                                                         | 38,747         |
| #5 | "knee osteoarthritis"/exp                                                                                                                                                                                                                                                                                                                                                                                                                                                                                                                                                                                                                                                                                                                                                                                                                                                                                          | 41,073         |
| #6 | "Osteoarthritis, Knee":ti,ab,kw,de OR "Knee<br>Osteoarthritides":ti,ab,kw,de OR "Knee<br>Osteoarthritis":ti,ab,kw,de OR "Osteoarthritis of<br>Knee":ti,ab,kw,de OR "Osteoarthritis of the Knee":ti,ab,kw,de<br>OR "osteoarthritic knee":ti,ab,kw,de OR "osteoarthritic<br>knees":ti,ab,kw,de OR "arthrosis, knee":ti,ab,kw,de OR<br>"femorotibial arthrosis":ti,ab,kw,de OR<br>"gonarthrosis":ti,ab,kw,de OR "knee arthrosis":ti,ab,kw,de OR<br>"knee joint arthrosis":ti,ab,kw,de OR "knee joint<br>osteoarthritis":ti,ab,kw,de OR "knee osteo-<br>arthritis":ti,ab,kw,de OR "knee osteo-arthrosis":ti,ab,kw,de<br>OR "knee osteoarthrosis":ti,ab,kw,de OR "osteoarthrosis,<br>knee":ti,ab,kw,de                                                                                                                                                                                                                  | 45,268         |
| #7 | <b>#1 OR #2 OR #3 OR #4 OR #5 OR #6</b>                                                                                                                                                                                                                                                                                                                                                                                                                                                                                                                                                                                                                                                                                                                                                                                                                                                                            | <b>164,232</b> |
| #8 | "human umbilical cord blood-derived mesenchymal stem<br>cell":ti,ab,kw,de OR "human umbilical cord blood-derived<br>mesenchymal stem cells":ti,ab,kw,de OR "hUCB-<br>MSC":ti,ab,kw,de OR "hUCB-MSCs":ti,ab,kw,de OR "umbilical<br>cord blood-derived mesenchymal stem cell":ti,ab,kw,de OR<br>"umbilical cord blood-derived mesenchymal stem cells<br>":ti,ab,kw,de OR "UCB-MSC":ti,ab,kw,de OR "UCB-<br>MSCs":ti,ab,kw,de OR "umbilical cord blood stem<br>cell":ti,ab,kw,de OR "umbilical cord blood stem<br>cells":ti,ab,kw,de OR "UC-mesenchymal stem<br>cells":ti,ab,kw,de OR "UC-MSC":ti,ab,kw,de OR "umbilical<br>cord mesenchymal stem cell":ti,ab,kw,de OR "umbilical cord<br>(UC) -mesenchymal stem cells (MSC)":ti,ab,kw,de OR<br>"umbilical cord mesenchymal stem cells":ti,ab,kw,de OR<br>"umbilical cord MSC":ti,ab,kw,de OR "umbilical cord MSC<br>(UC-MSC)":ti,ab,kw,de OR "umbilical cord-derived | 4,374          |

|                  |        | mesenchymal stem cell":ti,ab,kw,de OR "umbilical cord-derived mesenchymal stem cells":ti,ab,kw,de                                                                                                                                                                                                                                                                                                                                                                       |               |
|------------------|--------|-------------------------------------------------------------------------------------------------------------------------------------------------------------------------------------------------------------------------------------------------------------------------------------------------------------------------------------------------------------------------------------------------------------------------------------------------------------------------|---------------|
|                  | #9     | "UC-MSC transplantation":ti,ab,kw,de OR "umbilical cord-derived mesenchymal stem cell transplantation":ti,ab,kw,de OR "umbilical cord (UC) mesenchymal stem cells transplantation (MSCT)":ti,ab,kw,de OR "umbilical cord (UC)-derived mesenchymal stem cells (MSCs)":ti,ab,kw,de OR "UCMSCT":ti,ab,kw,de OR "UC-MSCT":ti,ab,kw,de                                                                                                                                       | 91            |
|                  | #10    | "cord blood stem cell transplantation"/exp                                                                                                                                                                                                                                                                                                                                                                                                                              | 6,901         |
|                  | #11    | "Cord Blood Stem Cell Transplantation":ti,ab,kw,de OR "Stem Cell Transplantation, Placental Blood":ti,ab,kw,de OR "Umbilical Cord Blood Stem Cell Transplantation":ti,ab,kw,de OR "Placental Blood Stem Cell Transplantation":ti,ab,kw,de OR "Stem Cell Transplantation, Cord Blood":ti,ab,kw,de OR "Blood Stem Cell Transplantation, Umbilical Cord":ti,ab,kw,de OR "cord blood transplantation":ti,ab,kw,de OR "umbilical cord stem cell transplantation":ti,ab,kw,de | 7,638         |
|                  | #12    | <b>#8 OR #9 OR #10 OR #11</b>                                                                                                                                                                                                                                                                                                                                                                                                                                           | <b>11,382</b> |
|                  | #13    | <b>#7 AND #12</b>                                                                                                                                                                                                                                                                                                                                                                                                                                                       | <b>120</b>    |
|                  |        |                                                                                                                                                                                                                                                                                                                                                                                                                                                                         |               |
| Database         | Search | Keywords                                                                                                                                                                                                                                                                                                                                                                                                                                                                | Results       |
| Cochrane Library | #1     | [mh "Cartilage, Articular"]                                                                                                                                                                                                                                                                                                                                                                                                                                             | 306           |
|                  | #2     | "Cartilage, Articular":ti,ab,kw OR "Articular Cartilage":ti,ab,kw OR "Articular Cartilages":ti,ab,kw OR "Cartilages, Articular":ti,ab,kw OR "knee cartilage defect":ti,ab,kw OR "cartilage, joint":ti,ab,kw OR "joint cartilage":ti,ab,kw                                                                                                                                                                                                                               | 1,000         |
|                  | #3     | [mh "Knee Joint"]                                                                                                                                                                                                                                                                                                                                                                                                                                                       | 3,664         |

|  |    |                                                                                                                                                                                                                                                                                                                                                                                                                                                                                                                                                                                                                                                                                                                                                                                                                                                                                                              |               |
|--|----|--------------------------------------------------------------------------------------------------------------------------------------------------------------------------------------------------------------------------------------------------------------------------------------------------------------------------------------------------------------------------------------------------------------------------------------------------------------------------------------------------------------------------------------------------------------------------------------------------------------------------------------------------------------------------------------------------------------------------------------------------------------------------------------------------------------------------------------------------------------------------------------------------------------|---------------|
|  | #4 | "Knee Joint":ti,ab,kw OR "Joint, Knee":ti,ab,kw OR "Joints, Knee":ti,ab,kw OR "Knee Joints":ti,ab,kw OR "Superior Tibiofibular Joint":ti,ab,kw OR "Joint, Superior Tibiofibular":ti,ab,kw OR "Joints, Superior Tibiofibular":ti,ab,kw OR "Superior Tibiofibular Joints":ti,ab,kw OR "Tibiofibular Joint, Superior":ti,ab,kw OR "Tibiofibular Joints, Superior":ti,ab,kw                                                                                                                                                                                                                                                                                                                                                                                                                                                                                                                                      | 6,734         |
|  | #5 | [mh "Osteoarthritis, Knee"]                                                                                                                                                                                                                                                                                                                                                                                                                                                                                                                                                                                                                                                                                                                                                                                                                                                                                  | 5,094         |
|  | #6 | "Osteoarthritis, Knee":ti,ab,kw OR "Knee Osteoarthritides":ti,ab,kw OR "Knee Osteoarthritis":ti,ab,kw OR "Osteoarthritis of Knee":ti,ab,kw OR "Osteoarthritis of the Knee":ti,ab,kw OR "osteoarthritic knee":ti,ab,kw OR "osteoarthritic knees":ti,ab,kw OR "arthrosis, knee":ti,ab,kw OR "femorotibial arthrosis":ti,ab,kw OR "gonarthrosis":ti,ab,kw OR "knee arthrosis":ti,ab,kw OR "knee joint arthrosis":ti,ab,kw OR "knee joint osteoarthritis":ti,ab,kw OR "knee osteo-arthritis":ti,ab,kw OR "knee osteoarthrosis":ti,ab,kw OR "osteoarthrosis, knee":ti,ab,kw                                                                                                                                                                                                                                                                                                                                       | 11,705        |
|  | #7 | <b>#1 OR #2 OR #3 OR #4 OR #5 OR #6</b>                                                                                                                                                                                                                                                                                                                                                                                                                                                                                                                                                                                                                                                                                                                                                                                                                                                                      | <b>16,258</b> |
|  | #8 | "human umbilical cord blood-derived mesenchymal stem cell":ti,ab,kw OR "human umbilical cord blood-derived mesenchymal stem cells":ti,ab,kw OR "hUCB-MSC":ti,ab,kw OR "hUCB-MSCs":ti,ab,kw OR "umbilical cord blood-derived mesenchymal stem cell":ti,ab,kw OR "umbilical cord blood-derived mesenchymal stem cells ":ti,ab,kw OR "UCB-MSC":ti,ab,kw OR "UCB-MSCs":ti,ab,kw OR "umbilical cord blood stem cell":ti,ab,kw OR "umbilical cord blood stem cells":ti,ab,kw OR "UC-mesenchymal stem cells":ti,ab,kw OR "UC-MSC":ti,ab,kw OR "umbilical cord mesenchymal stem cell":ti,ab,kw OR "umbilical cord (UC) -mesenchymal stem cells (MSC)":ti,ab,kw OR "umbilical cord mesenchymal stem cells":ti,ab,kw OR "umbilical cord MSC":ti,ab,kw OR "umbilical cord MSC (UC-MSC)":ti,ab,kw OR "umbilical cord-derived mesenchymal stem cell":ti,ab,kw OR "umbilical cord-derived mesenchymal stem cells":ti,ab,kw | 277           |

|  |     |                                                                                                                                                                                                                                                                                                                                                                                                                                                 |            |
|--|-----|-------------------------------------------------------------------------------------------------------------------------------------------------------------------------------------------------------------------------------------------------------------------------------------------------------------------------------------------------------------------------------------------------------------------------------------------------|------------|
|  | #9  | "UC-MSC transplantation":ti,ab,kw OR "umbilical cord-derived mesenchymal stem cell transplantation":ti,ab,kw OR "umbilical cord (UC) mesenchymal stem cells transplantation (MSCT)":ti,ab,kw OR "umbilical cord (UC) -derived mesenchymal stem cells (MSCs)":ti,ab,kw OR "UCMSCT":ti,ab,kw OR "UC-MSCT":ti,ab,kw                                                                                                                                | 14         |
|  | #10 | [mh "Cord Blood Stem Cell Transplantation"]                                                                                                                                                                                                                                                                                                                                                                                                     | 27         |
|  | #11 | "Cord Blood Stem Cell Transplantation":ti,ab,kw OR "Stem Cell Transplantation, Placental Blood":ti,ab,kw OR "Umbilical Cord Blood Stem Cell Transplantation":ti,ab,kw OR "Placental Blood Stem Cell Transplantation":ti,ab,kw OR "Stem Cell Transplantation, Cord Blood":ti,ab,kw OR "Blood Stem Cell Transplantation, Umbilical Cord":ti,ab,kw OR "cord blood transplantation":ti,ab,kw OR "umbilical cord stem cell transplantation":ti,ab,kw | 150        |
|  | #12 | <b>#8 OR #9 OR #10 OR #11</b>                                                                                                                                                                                                                                                                                                                                                                                                                   | <b>411</b> |
|  | #13 | <b>#7 AND #12</b>                                                                                                                                                                                                                                                                                                                                                                                                                               | <b>20</b>  |

| Database              | Search | Keywords                                                                                                                                                                                                                                                                                                                                                                                                                                            | Results       |
|-----------------------|--------|-----------------------------------------------------------------------------------------------------------------------------------------------------------------------------------------------------------------------------------------------------------------------------------------------------------------------------------------------------------------------------------------------------------------------------------------------------|---------------|
| <b>Web of Science</b> | #1     | TS=("Cartilage, Articular" OR "Articular Cartilage" OR "Articular Cartilages" OR "Cartilages, Articular" OR "knee cartilage defect" OR "cartilage, joint" OR "joint cartilage")                                                                                                                                                                                                                                                                     | 37,687        |
|                       | #2     | TS=("Knee Joint" OR "Joint, Knee" OR "Joints, Knee" OR "Knee Joints" OR "Superior Tibiofibular Joint" OR "Joint, Superior Tibiofibular" OR "Joints, Superior Tibiofibular" OR "Superior Tibiofibular Joints" OR "Tibiofibular Joint, Superior" OR "Tibiofibular Joints, Superior")                                                                                                                                                                  | 27,421        |
|                       | #3     | TS=("Osteoarthritis, Knee" OR "Knee Osteoarthritis" OR "Knee Osteoarthritis" OR "Osteoarthritis of Knee" OR "Osteoarthritis of the Knee" OR "osteoarthritic knee" OR "osteoarthritic knees" OR "arthrosis, knee" OR "femorotibial arthrosis" OR "gonarthrosis" OR "knee arthrosis" OR "knee joint arthrosis" OR "knee joint osteoarthritis" OR "knee osteo-arthritis" OR "knee osteo-arthritis" OR "knee osteoarthrosis" OR "osteoarthrosis, knee") | 30,180        |
|                       | #4     | <b>#1 OR #2 OR #3</b>                                                                                                                                                                                                                                                                                                                                                                                                                               | <b>84,571</b> |

|          | #5     | TS=("human umbilical cord blood-derived mesenchymal stem cell" OR "human umbilical cord blood-derived mesenchymal stem cells" OR "hUCB-MSC" OR "hUCB-MSCs" OR "umbilical cord blood-derived mesenchymal stem cell" OR "umbilical cord blood-derived mesenchymal stem cells " OR "UCB-MSC" OR "UCB-MSCs" OR "umbilical cord blood stem cell" OR "umbilical cord blood stem cells" OR "UC-mesenchymal stem cells" OR "UC-MSC" OR "umbilical cord mesenchymal stem cell" OR "umbilical cord (UC) - mesenchymal stem cells (MSC)" OR "umbilical cord mesenchymal stem cells" OR "umbilical cord MSC" OR "umbilical cord MSC (UC-MSC)" OR "umbilical cord-derived mesenchymal stem cell" OR "umbilical cord-derived mesenchymal stem cells") | 3,027   |
|----------|--------|-----------------------------------------------------------------------------------------------------------------------------------------------------------------------------------------------------------------------------------------------------------------------------------------------------------------------------------------------------------------------------------------------------------------------------------------------------------------------------------------------------------------------------------------------------------------------------------------------------------------------------------------------------------------------------------------------------------------------------------------|---------|
|          | #6     | TS=("UC-MSC transplantation" OR "umbilical cord-derived mesenchymal stem cell transplantation" OR "umbilical cord (UC) mesenchymal stem cells transplantation (MSCT)" OR "umbilical cord (UC) -derived mesenchymal stem cells (MSCs)" OR "UCMSCT" OR "UC-MSCT")                                                                                                                                                                                                                                                                                                                                                                                                                                                                         | 53      |
|          | #7     | TS=("Cord Blood Stem Cell Transplantation" OR "Stem Cell Transplantation, Placental Blood" OR "Umbilical Cord Blood Stem Cell Transplantation" OR "Placental Blood Stem Cell Transplantation" OR "Stem Cell Transplantation, Cord Blood" OR "Blood Stem Cell Transplantation, Umbilical Cord" OR "cord blood transplantation" OR "umbilical cord stem cell transplantation")                                                                                                                                                                                                                                                                                                                                                            | 4,639   |
|          | #8     | #5 OR #6 OR #7                                                                                                                                                                                                                                                                                                                                                                                                                                                                                                                                                                                                                                                                                                                          | 7,575   |
|          | #9     | #7 AND #12                                                                                                                                                                                                                                                                                                                                                                                                                                                                                                                                                                                                                                                                                                                              | 76      |
|          |        |                                                                                                                                                                                                                                                                                                                                                                                                                                                                                                                                                                                                                                                                                                                                         |         |
| Database | Search | Keywords                                                                                                                                                                                                                                                                                                                                                                                                                                                                                                                                                                                                                                                                                                                                | Results |
| Scopus   | #1     | TITLE-ABS-KEY("Cartilage, Articular" OR "Articular Cartilage" OR "Articular Cartilages" OR "Cartilages, Articular" OR "knee cartilage defect" OR "cartilage, joint" OR "joint cartilage")                                                                                                                                                                                                                                                                                                                                                                                                                                                                                                                                               | 50,945  |
|          | #2     | TITLE-ABS-KEY("Knee Joint" OR "Joint, Knee" OR "Joints, Knee" OR "Knee Joints" OR "Superior Tibiofibular Joint" OR "Joint, Superior Tibiofibular" OR "Joints, Superior Tibiofibular" OR "Superior Tibiofibular Joints" OR "Tibiofibular Joint, Superior" OR "Tibiofibular Joints,                                                                                                                                                                                                                                                                                                                                                                                                                                                       | 82,622  |

|  |    |                                                                                                                                                                                                                                                                                                                                                                                                                                                                                                                                                                                                                                                                                                                                       |                |
|--|----|---------------------------------------------------------------------------------------------------------------------------------------------------------------------------------------------------------------------------------------------------------------------------------------------------------------------------------------------------------------------------------------------------------------------------------------------------------------------------------------------------------------------------------------------------------------------------------------------------------------------------------------------------------------------------------------------------------------------------------------|----------------|
|  |    | Superior")                                                                                                                                                                                                                                                                                                                                                                                                                                                                                                                                                                                                                                                                                                                            |                |
|  | #3 | TITLE-ABS-KEY("Osteoarthritis, Knee" OR "Knee Osteoarthritis" OR "Knee Osteoarthritis" OR "Osteoarthritis of Knee" OR "Osteoarthritis of the Knee" OR "osteoarthritic knee" OR "osteoarthritic knees" OR "arthrosis, knee" OR "femorotibial arthrosis" OR "gonarthrosis" OR "knee arthrosis" OR "knee joint arthrosis" OR "knee joint osteoarthritis" OR "knee osteo-arthritis" OR "knee osteoarthrosis" OR "knee osteoarthrosis" OR "osteoarthrosis, knee")                                                                                                                                                                                                                                                                          | 44,610         |
|  | #4 | <b>#1 OR #2 OR #3</b>                                                                                                                                                                                                                                                                                                                                                                                                                                                                                                                                                                                                                                                                                                                 | <b>150,106</b> |
|  | #5 | TITLE-ABS-KEY("human umbilical cord blood-derived mesenchymal stem cell" OR "human umbilical cord blood-derived mesenchymal stem cells" OR "hUCB-MS" OR "hUCB-MS" OR "umbilical cord blood-derived mesenchymal stem cell" OR "umbilical cord blood-derived mesenchymal stem cells " OR "UCB-MS" OR "UCB-MS" OR "umbilical cord blood stem cell" OR "umbilical cord blood stem cells" OR "UC-mesenchymal stem cells" OR "UC-MS" OR "umbilical cord mesenchymal stem cell" OR "umbilical cord (UC) -mesenchymal stem cells (MS)" OR "umbilical cord mesenchymal stem cells" OR "umbilical cord MS" OR "umbilical cord MS (UC-MS)" OR "umbilical cord-derived mesenchymal stem cell" OR "umbilical cord-derived mesenchymal stem cells") | 3,974          |
|  | #6 | TITLE-ABS-KEY("UC-MS transplantation" OR "umbilical cord-derived mesenchymal stem cell transplantation" OR "umbilical cord (UC) mesenchymal stem cells transplantation (MS)" OR "umbilical cord (UC) -derived mesenchymal stem cells (MS)" OR "UCMS" OR "UC-MS")                                                                                                                                                                                                                                                                                                                                                                                                                                                                      | 83             |
|  | #7 | TITLE-ABS-KEY("Cord Blood Stem Cell Transplantation" OR "Stem Cell Transplantation, Placental Blood" OR "Umbilical Cord Blood Stem Cell Transplantation" OR "Placental Blood Stem Cell Transplantation" OR "Stem Cell Transplantation, Cord Blood" OR "Blood Stem Cell Transplantation, Umbilical Cord" OR "cord blood transplantation" OR "umbilical cord stem cell transplantation")                                                                                                                                                                                                                                                                                                                                                | 7,068          |



|  |           |                       |               |
|--|-----------|-----------------------|---------------|
|  | <b>#8</b> | <b>#5 OR #6 OR #7</b> | <b>10,652</b> |
|  | <b>#9</b> | <b>#7 AND #12</b>     | <b>102</b>    |

| <b>Database</b>  | <b>Results</b> |
|------------------|----------------|
| PubMed           | 62             |
| EMBASE           | 120            |
| Cochrane Library | 20             |
| Web of Science   | 76             |
| Scopus           | 102            |
| Total            | 380            |
| duplication      | 211            |
| Final            | 169            |
