# Supplementary material for: Cartilage Regeneration Using Human Umbilical Cord Blood Derived Mesenchymal Stem Cells: A Systematic Review and Meta-Analysis
Source: MDPI journal article supplement (doi:10.3390/medicina58121801), 2022-12-06
Supplement: s1 [file s1]

Supplementary file S2. Funnel plot of IKDC(a), WOMAC(b), VAS(c)

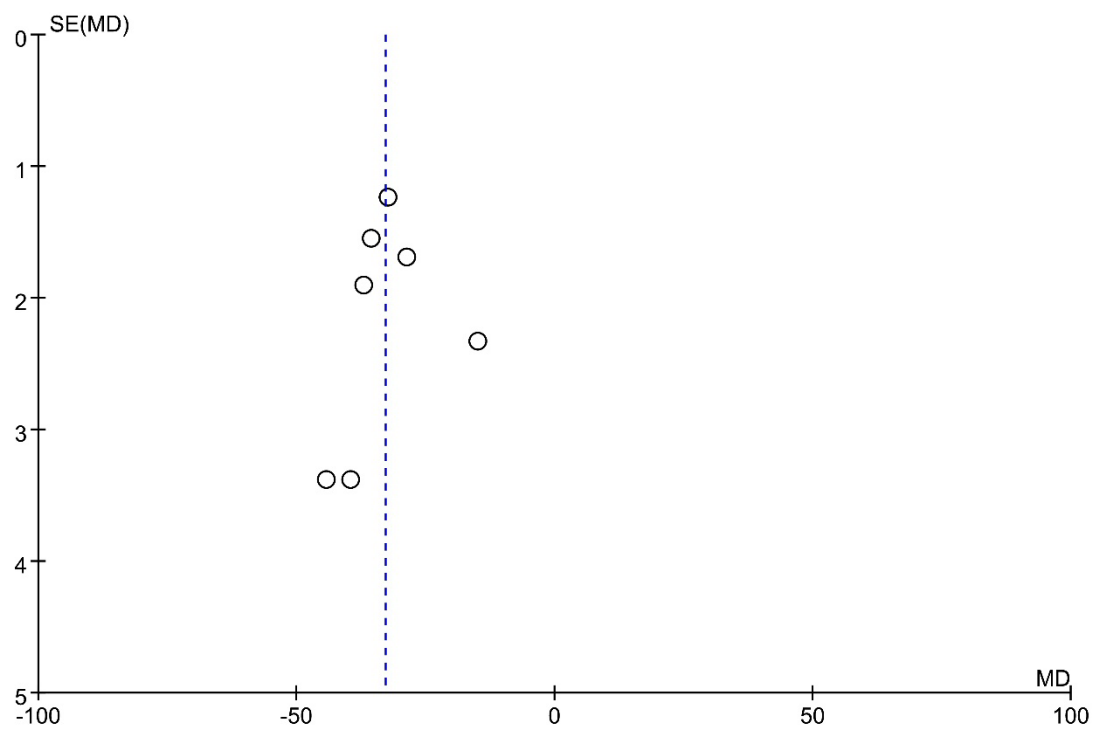

(a) Funnel plot of IKDC subjective score between preoperative IKDC and IKDC at final follow up.

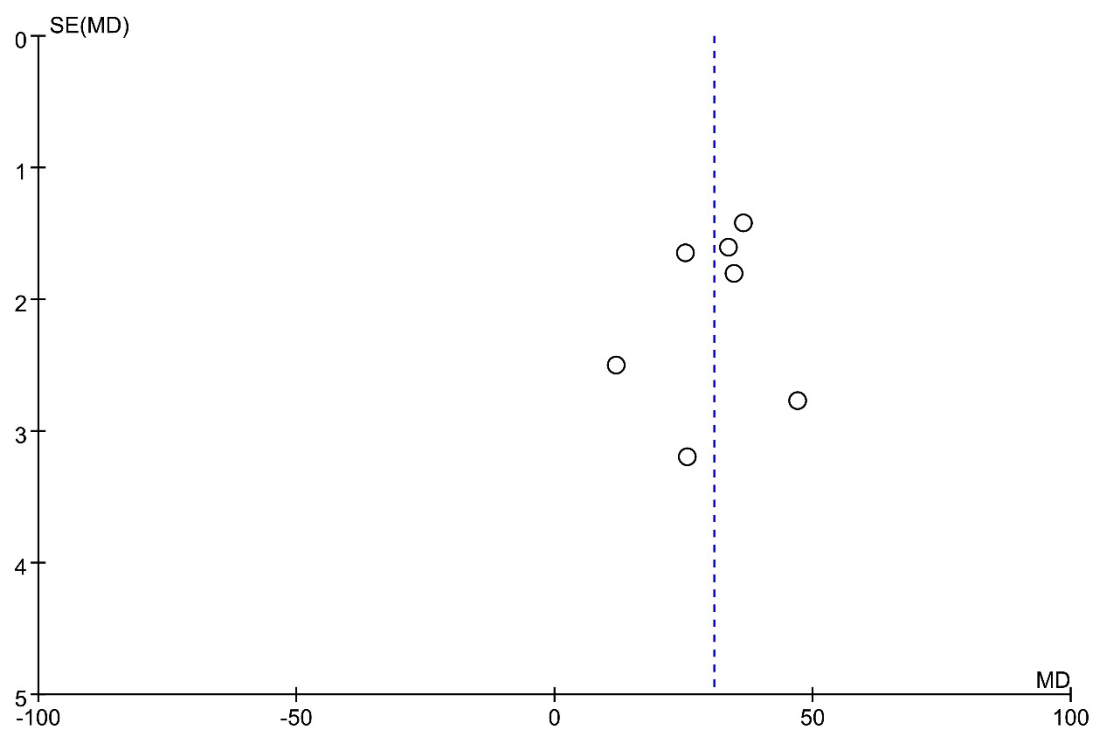

(b) Funnel plot of WOMAC between preoperative WOMAC and WOMAC at final follow up.

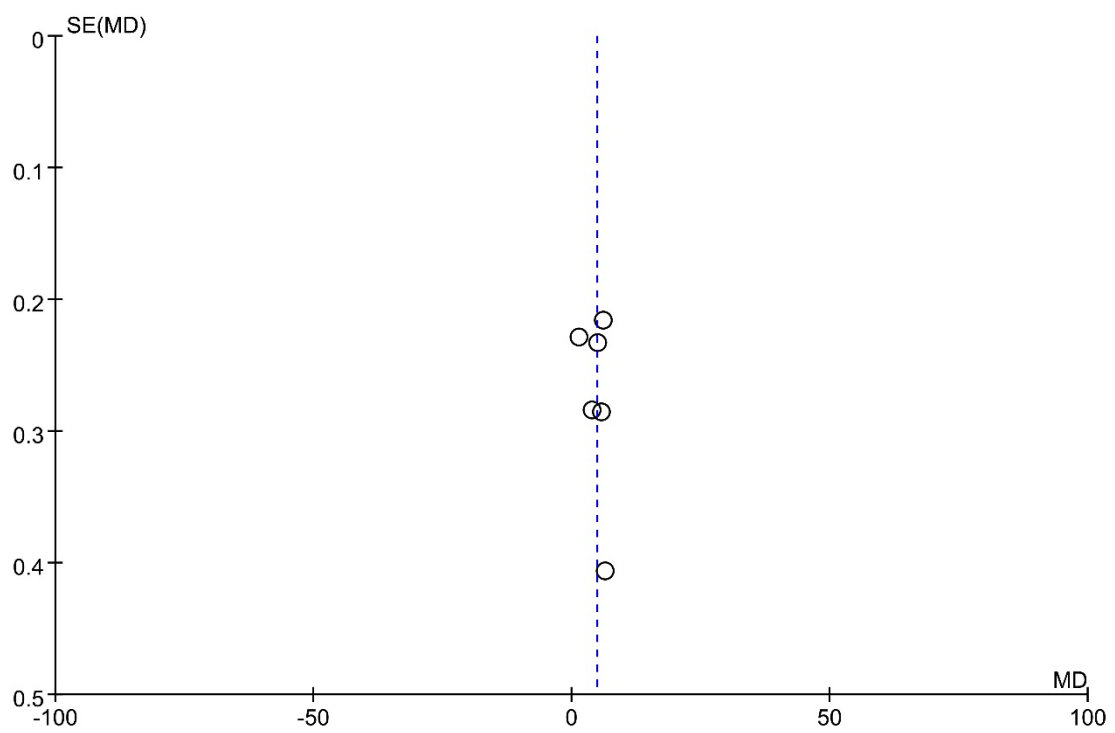

(c) Funnel plot of VAS between preoperative VAS and VAS at final follow up.
